# Supplementary material for: Determination of particle size distribution of water-soluble CdTe quantum dots by optical spectroscopy
Source: Royal Society of Chemistry journal article supplement (doi:10.1039/c4ra05979d), 2014-01-01
Supplement: c4ra05979d1.pdf [file c4ra05979d1.pdf]

## Determination of Particle Size Distribution of Water-Soluble CdTe Quantum Dots by Optical Spectroscopy

J.C.L. Sousa<sup>1</sup>, M.G. Vivas<sup>2,3</sup>, J.L. Ferrari<sup>1</sup>, C.R. Mendonca<sup>3</sup>, M.A. Schiavon<sup>\*,1</sup>

<sup>1</sup>Grupo de Pesquisa em Química de Materiais (GPQM), Departamento de Ciências Naturais, Universidade Federal de São João del-Rei, 74, 36301-160, São João del-Rei, MG, Brazil

<sup>2</sup>Instituto de Ciência e Tecnologia, Universidade Federal de Alfenas, Cidade Universitária - BR 267 Km 533, 37715-400, Poços de Caldas, MG, Brazil

<sup>3</sup>Instituto de Física de São Carlos, Universidade de São Paulo, Caixa Postal 369, 13560-970 São Carlos, SP, Brazil

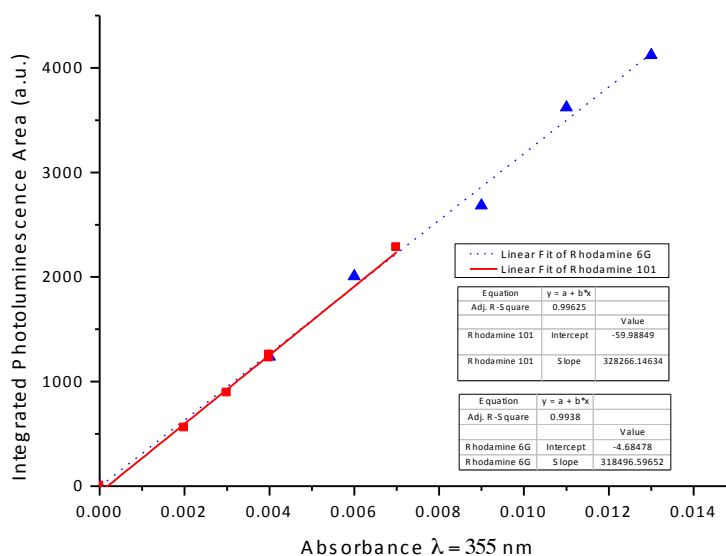

**Figure S1.** Calibration curves for the fluorescence quantum yield of rhodamine 6G (97%) in aqueous media by using rhodamine 101(100%) as reference.

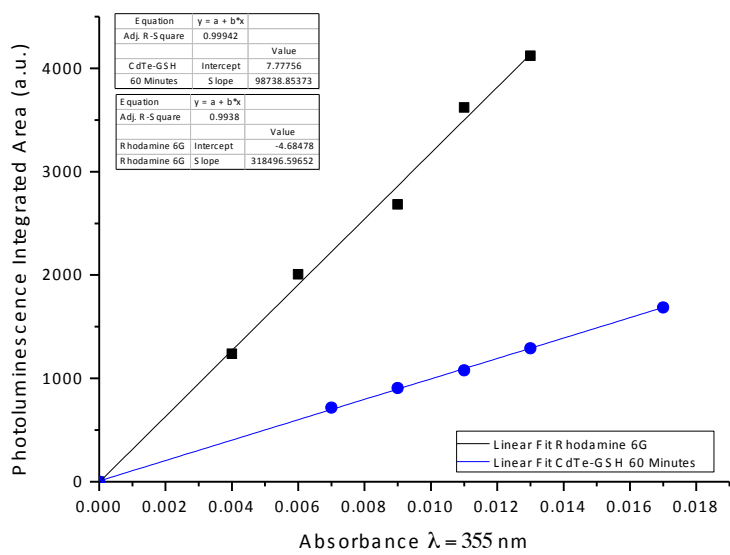

**Figure S2.** Calibration curves for the fluorescence quantum yield of rhodamine 6G (97%) and CdTe-GSH (60 minutes of synthesis) in aqueous media.

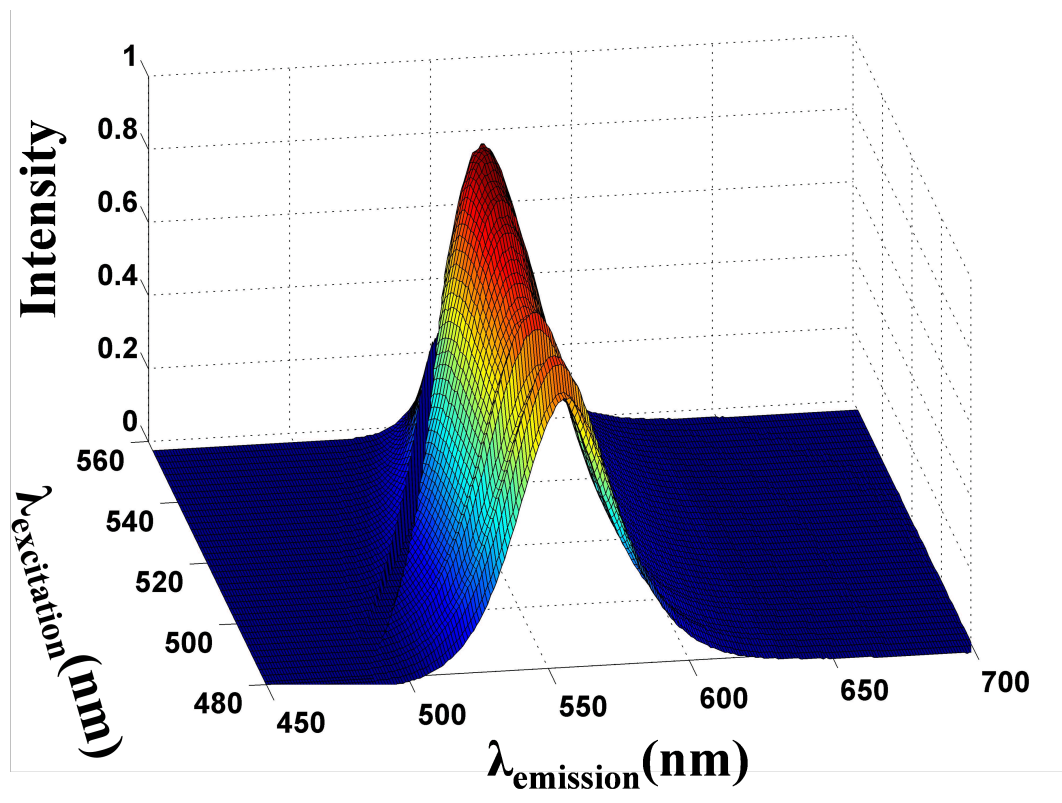

**Figure S3.** Fluorescence spectra of CdTe QDs (30 minutes of synthesis) obtained after excitation at different wavelengths.

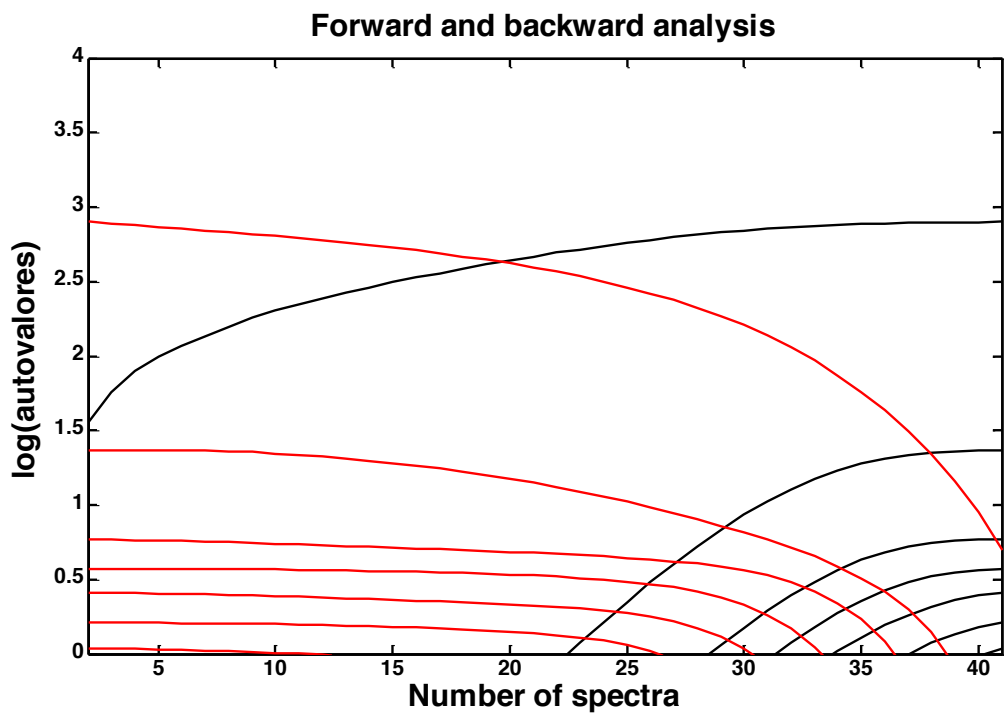

**Figure S4.** Forward and backward analysis for the CdTe QDs (30 minutes of synthesis).

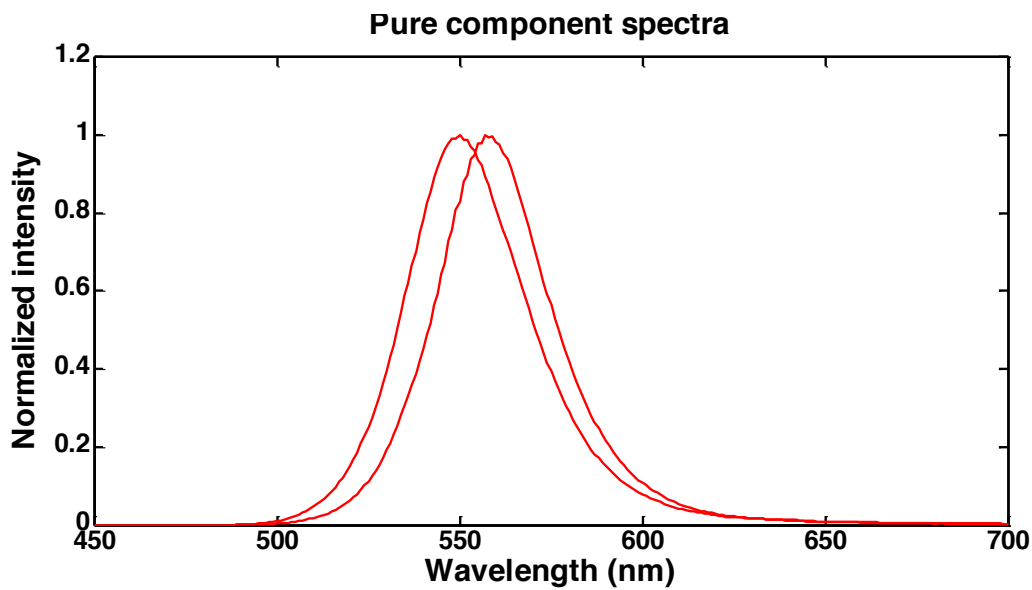

**Figure S5.** Pure component spectra obtained from the EFA-MCR method for the CdTe QDs (30 minutes of synthesis).

## QDs size dispersion program

```
clear all;
format long;
%Graphic parameters
COR=['b' 'g' 'r' 'c' 'm' 'y' 'k'];k=7;
cor=COR(k);
ft=14;
aa=2.0;
axy=2.0;
ttitulo=11;
awords=1.5;
%*****
%*****
%Pathway
p=path;
path(p,'put the pathway');

arq_I=load('put the matrix M (n,m)');
arq_lamb=load('put the matrix W(m)');
arq_exc=load('put the excitation wavelength matrix');
arq_A=load('put the absorption spectrum data');
arq_lamp=load('put the lamp data intensity');

IF_exp= arq_I';
lamb_exp= arq_lamb';
lamb_exc=arq_exc(:)';
lamb_abs=arq_A(1,:)';
A_exp=arq_A(2,:) ';
I_lamp=arq_lamp(2,:)';
lamb_lamp=arq_lamp(1,:)';
%*****
% Filter routine
N=length(A_exp);
N1=length(I_lamp);
[m,n]=size(IF_exp);
lamb_fluo_ini=lamb_exp(1);

for i=1:m
    for j=1:n
        if(lamb_exc(i)>lamb_fluo_ini)
            if((lamb_exc(i)>=((lamb_exp(j)+2)-7)) && lamb_exc(i) <=
((lamb_exp(j)+2)+0))
                M_aux(i,j)=IF_exp(i,j);
            else
                M_aux(i,j)=0.0;
            end
        end
    end

end

end

end
```

```

for i=1:m
    for j=1:n
        M_aux_2(i,j)=IF_exp(i,j)-M_aux(i,j);
    end
end

M_aux_2=IF_exp;

%*****
% Obtaining the absorbance value corresponding to the excitation wave-
length
for i=1:m
    for j=1:N
        if lamb_abs(j)==lamb_exc(i)
            A_exp_aux(i)=A_exp(j)+0.001;
        end
    end
end

%Storing the lamp data
lamb_lamp=round(lamb_lamp);
count=0.0;
AS=mean(I_lamp);
for i=1:m
    for j=1:N1
        if (lamb_lamp(j)==lamb_exc(i))
            I_lamp_aux(i)=I_lamp(j);
        end
    end
end

I_lamb_aux=I_lamp_aux/max(I_lamp_aux);

for i=1:m
    IF_exp_max(i)=max(IF_exp(i,:));
end

% Introducing the calibration curve (diameter versus fluorescence peak)
and finding the wavelength that corresponds to the fluorescence peak

aux_D=0.0;
for i=1:m
    for j=1:n
        if IF_exp(i,j)==IF_exp_max(i)
            lamb_exp_aux(i)=lamb_exp(j);
        end
    end
    D(i)= put the empirical equation (diameter versus fluorescence peak);
end

%*****

```

```

% Introducing the calibration curve "fluorescence quantum yield versus
diameter"

aux_D=0.0;
for i=1:m
    for j=1:n
        if IF_exp(i,j)==IF_exp_max(i)
            lamb_exp_aux(i)=lamb_exp(j);
        end
    end
    QY_f(i)= put the empirical equation (QY versus diameter);;
end

QY=QY_f;

%*****
% Obtaining the percentage of QDs present in solution

L=1; %comprimento da cubeta dado em cm
for i=1:m
    Epsilon(i)=10043*(D(i)^(2.12));
    C(i)=A_exp_aux(i)/(Epsilon(i)*L); %molar
    IF_int(i)=((IF_exp_max(i))/(I_lamp_aux(i)*QY(i)*Epsilon(i)*L*C(i)));
end

Q_QDs=((IF_int)/sum(IF_int))*100;

%*****
%Finding QDs with the same diameter and adding them

j_aux=0.0;
count=0.0;
for i=1:m
    for j=1:m
        if(j~=i)
            if (j~=j_aux)
                if(D(j)==D(i))
                    count=count+1.0;
                    aux_D_s(count)=D(j);
                    j_aux(count)=j;
                    Q_QDs(i)=Q_QDs(i)+Q_QDs(j);
                    Q_QDs(j)=0.0;
                end
            end
        end
    end
end

count=0.0;
for i=1:m

```

```

    if(Q_QDs(i)~=0.0)
        count=count+1.0;
        Q_QDs_aux(count)=Q_QDs(i);
        D_Q_QDs_aux(count)=D(i);
    end
end

%*****
% Graphs
figure(1); bar(D_Q_QDs_aux,Q_QDs_aux,5,'r','linewidth',aa);hold on;
ylabel('P(%) ','fontsize',ft,'fontweight','bold');
set(h1,'linewidth',2,'fontsize',ft,'fontweight','bold');

```
